# Supplementary material for: The degradation and recovery behavior of mixed-cation perovskite solar cells in moisture and a gas mixture environment
Source: Royal Society of Chemistry journal article supplement (doi:10.1039/d2ta02352k), 2022-01-01
Supplement: d2ta02352k1.pdf [file d2ta02352k1.pdf]

## Supplementary Materials

### The Degradation and Recovery behaviors of Mix-cations Perovskite Solar Cells in Carbon Dioxide and Moisture Environment

George Wenson,<sup>1,2</sup> Harshul Thakkar,<sup>1</sup> Hsinhan Tsai,<sup>1</sup> Joshua Stein,<sup>3</sup> Rajinder Singh,<sup>1</sup> Wanyi Nie<sup>1\*</sup>

<sup>1</sup>Los Alamos National Laboratory, 30 Bikini Atoll, Los Alamos, NM, 87545, USA

<sup>2</sup>Honors College School of Engineering, Rutgers University, New Brunswick, NJ 008854, USA

<sup>3</sup>Sandia National Laboratory, Albuquerque, New Mexico, 87123, USA

\*Correspondence: [wanyi@lanl.gov](mailto:wanyi@lanl.gov)

## Supplementary Figures

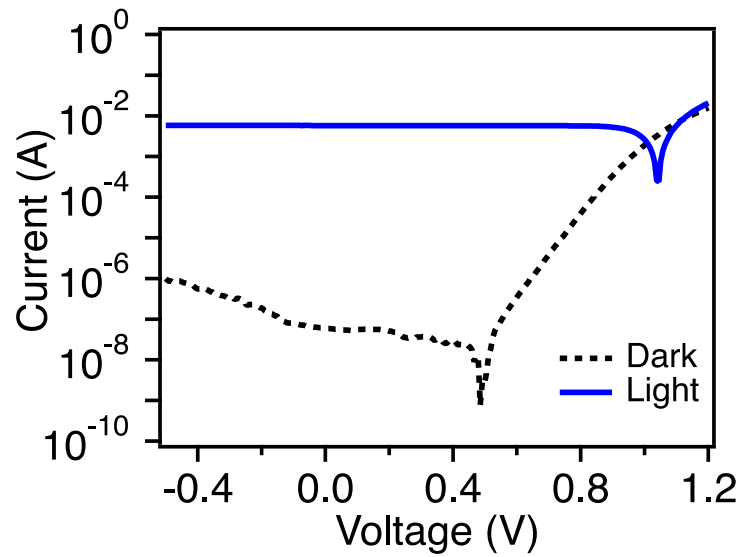

**Figure S1.** On-off ratio from perovskites devices' *J-V* characteristic curves of dark and light.

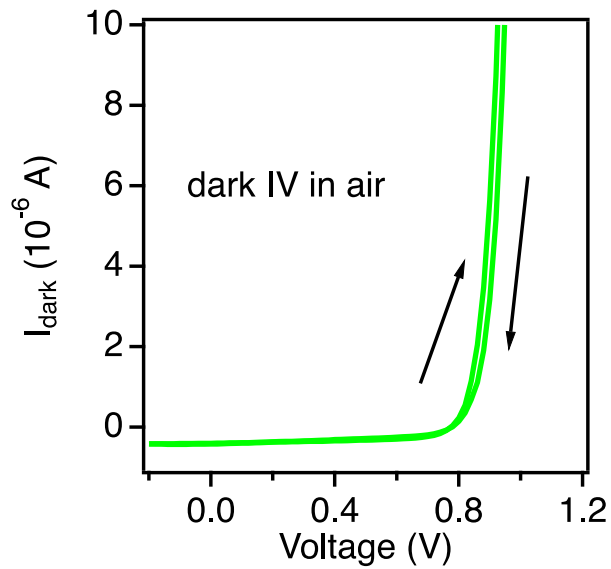

**Figure S2.** Hysteresis loop scan of dark IV curve for Au device collected under ambient environment.

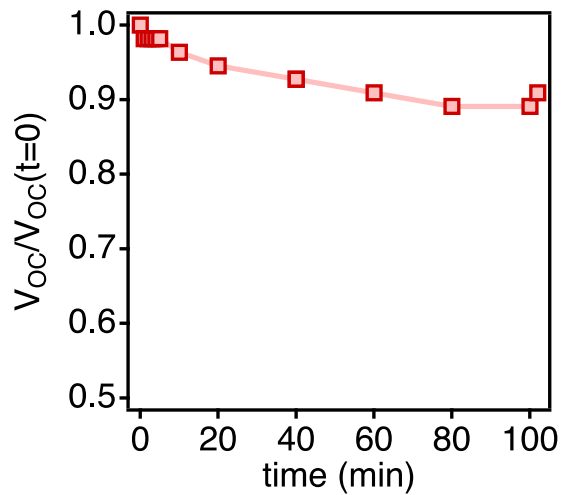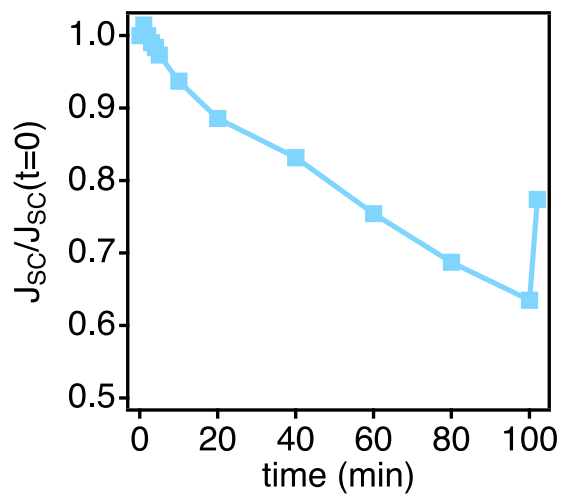

**Figure S3.** Time evolution of (a) the normalized  $V_{oc}$  and (b)  $J_{sc}$  under dry nitrogen environment.

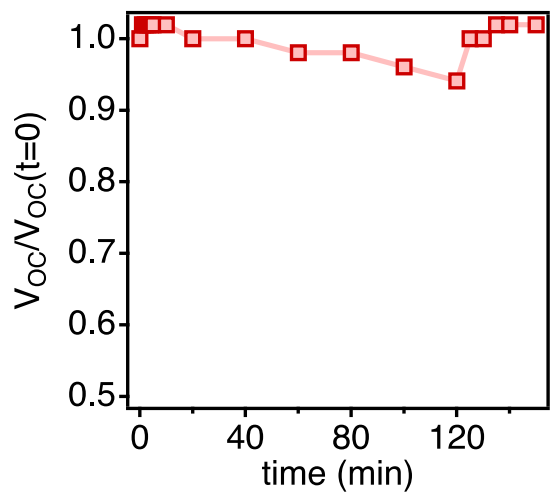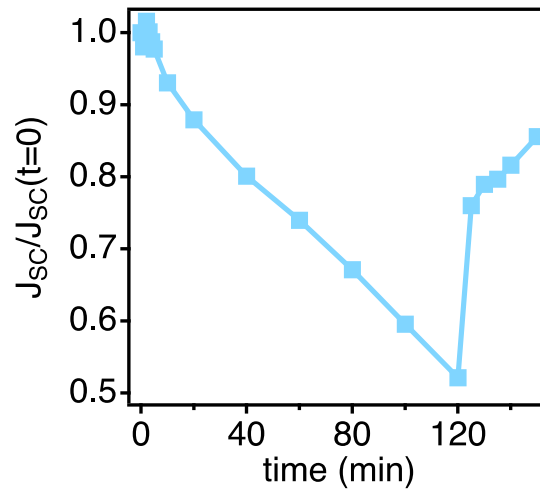

**Figure S4.** Time evolution of (a) the normalized  $V_{oc}$  and (b)  $J_{sc}$  for repeating  $CO_2$  with RH=0%.

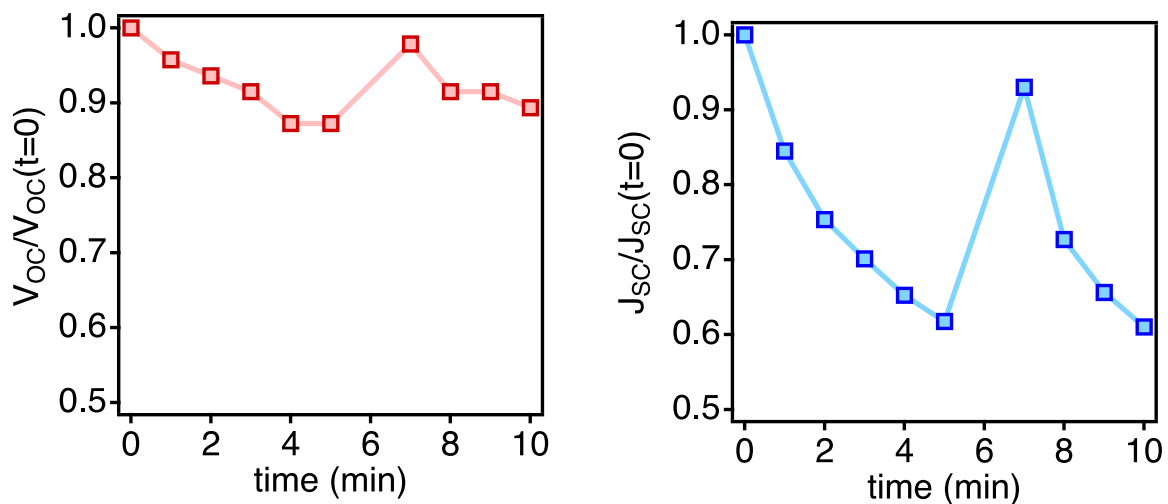

**Figure S5.** Time evolution of (a) the normalized  $V_{oc}$  and (b)  $J_{sc}$  under ambient environment (air, R.H. = 20 %).

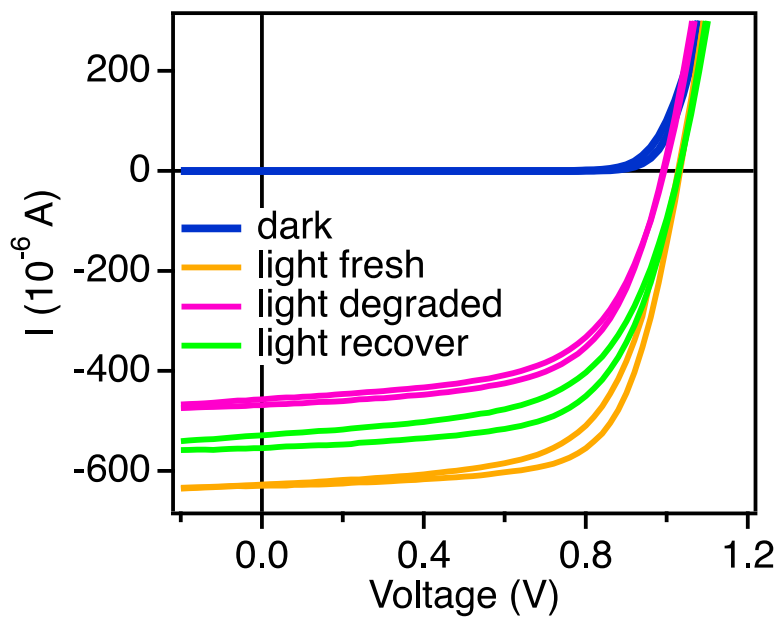

**Figure S6.** Hysteresis loop scan with repeating light  $J$ - $V$  curves for  $CO_2$  with RH=0% at fresh, degraded and recovered status.

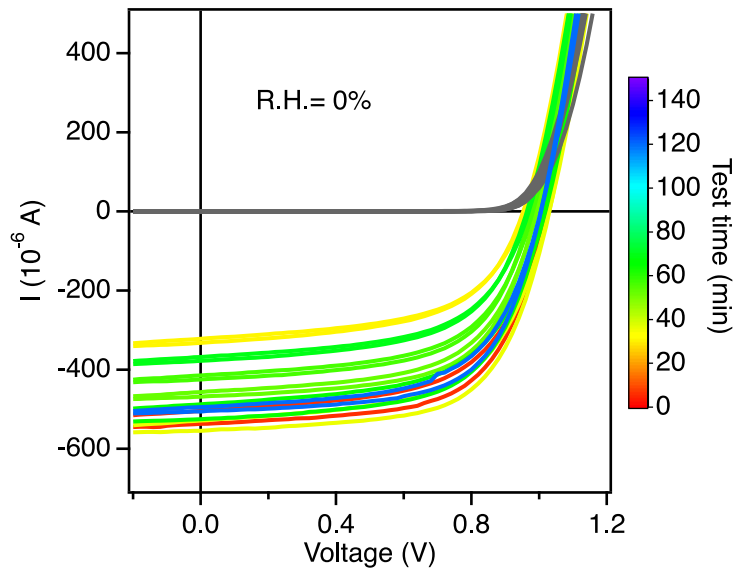

**Figure S7.** Hysteresis loop scan with repeating light  $J$ - $V$  curves for  $\text{CO}_2$  with RH=60% at various exposure time.

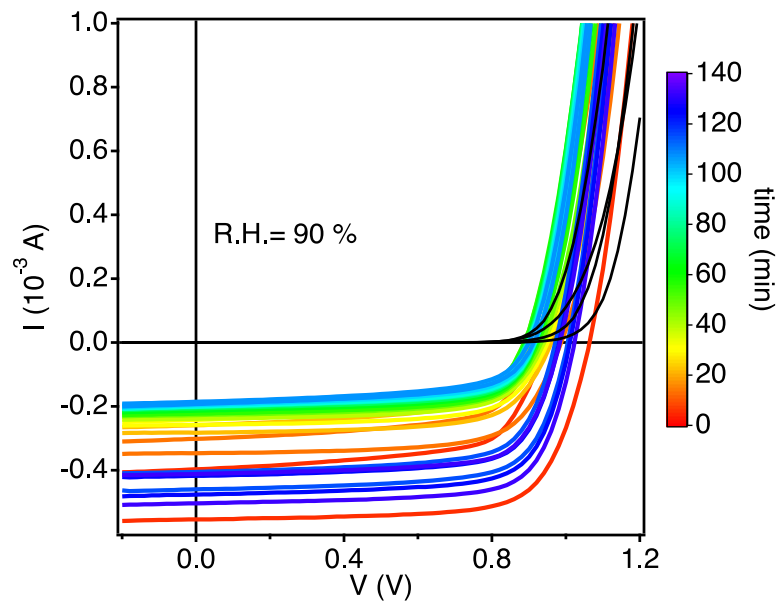

**Figure S8.** Hysteresis loop scan with repeating light  $J$ - $V$  curves for  $\text{CO}_2$  with RH=90% at various exposure time.

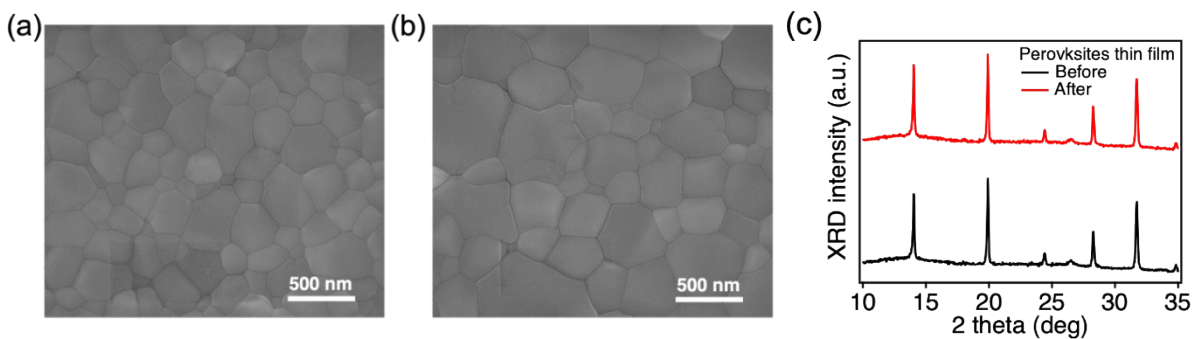

**Figure S9.** SEM surface views for perovskite thin film (a) before and (b) after the exposure in CO<sub>2</sub> with R.H.=90% environment for 2 hours under illumination. XRD patterns for the perovskites device before and after testing under CO<sub>2</sub> with R.H.=90% environment.

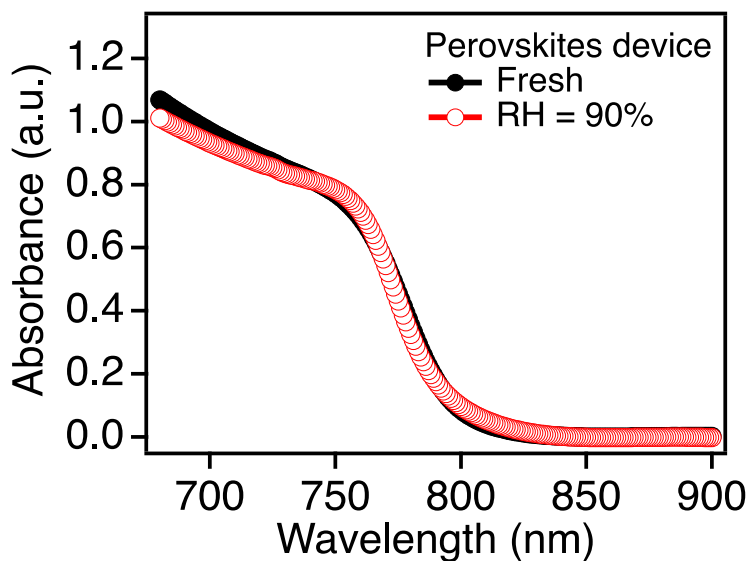

**Figure S10.** UV-Vis absorption spectra for the perovskites device before and after testing under CO<sub>2</sub> with R.H. = 90 % environment.

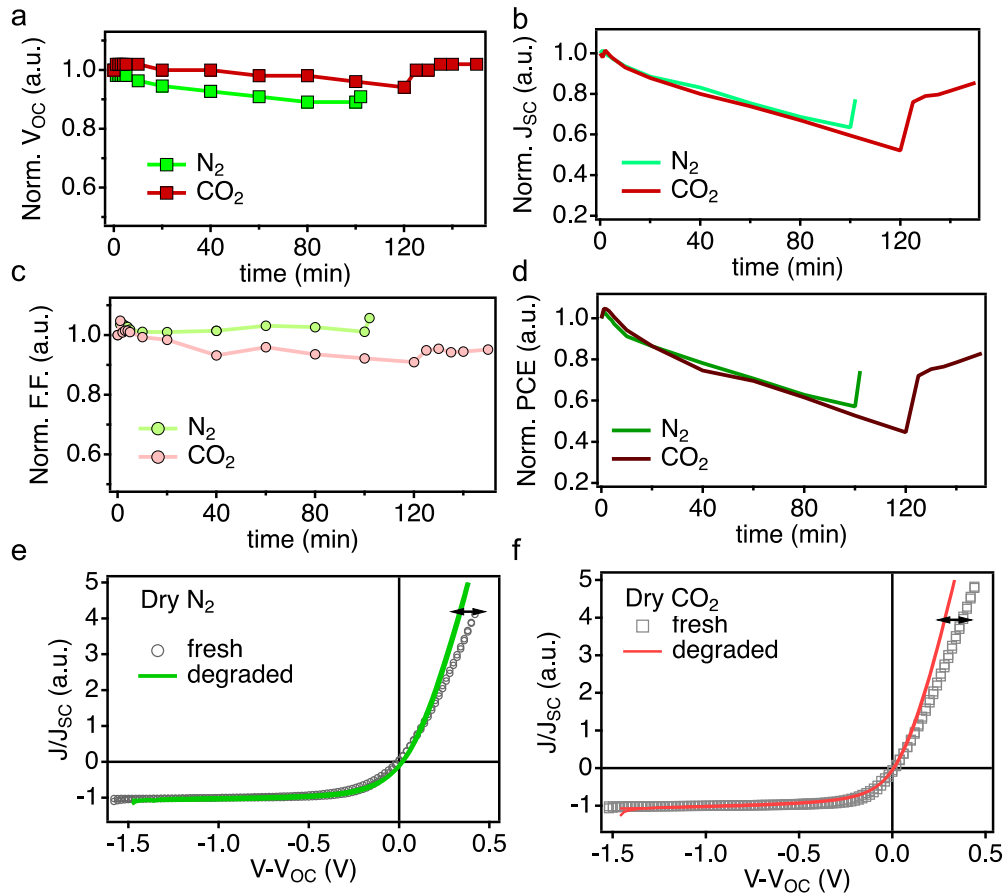

Figure S11 Detailed analysis for the device degradation behavior in dry  $N_2$  versus dry  $CO_2$

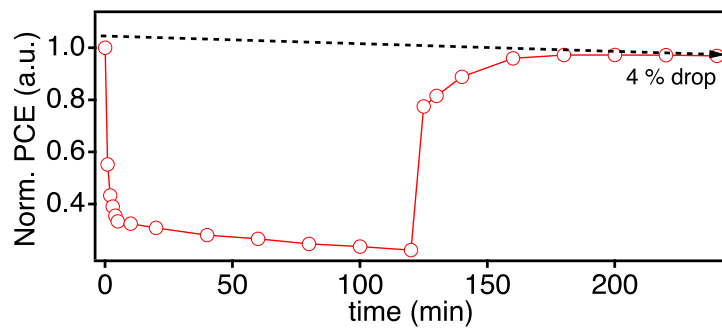

Fig. S12 Time evolution of the device's PCE for longer time (2-hr) of exposure to R.H. = 90 % in  $CO_2$  gas.

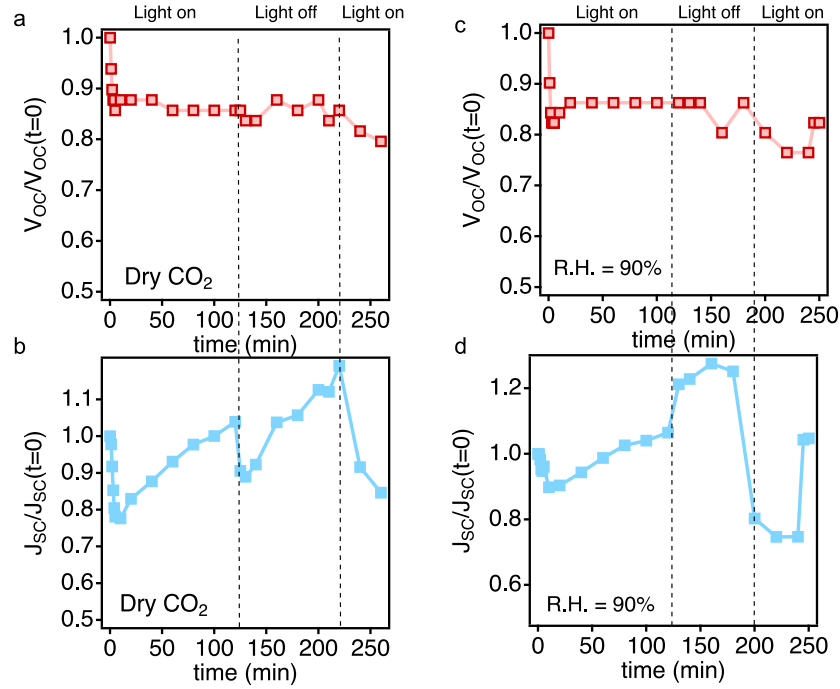

Fig. S12 device made with perovskite layer without ionic liquid additive. The degradation tests are performed under illumination and in dark for recovery observations. (a) & (b) are normalized  $V_{OC}$  and  $J_{SC}$  curves in dry  $CO_2$ , (c) & (d) are the same figure of merits in humid  $CO_2$ .

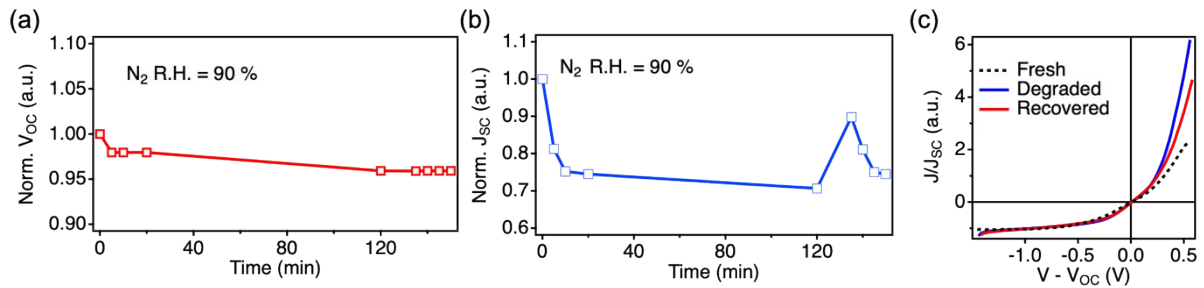

Fig. S13 The device's degradation behavior under  $N_2$  with R.H. = 90 %. The time evolution of (a) normalized  $V_{OC}$  and (b) normalized  $J_{SC}$  when exposed under constant illumination. (c) normalized JV curves to compare the JV behavior before and after degradation.
